# Supplementary material for: Potential impacts of marine urbanization on benthic macrofaunal diversity
Source: PubMed Central journal article supplement (PMC7889940; doi:10.1038/s41598-021-83597-z), 2021-02-17
Supplement: 41598_2021_83597_MOESM1_ESM.pdf [file 41598_2021_83597_MOESM1_ESM.pdf]

**Potential impacts of marine urbanization on  
benthic macrofaunal diversity**

**- Supplementary data -**

**Kyosuke Momota<sup>1,2,\*</sup> and Shinya Hosokawa<sup>2</sup>**

<sup>1</sup> Central Laboratory, Marine Ecology Research Institute, 300 Iwawada, Onjuku, Isumi,  
Chiba 299-5105, Japan

<sup>2</sup> Port and Airport Research Institute, 3-1-1 Nagase, Yokosuka, Kanagawa 239-0826,  
Japan.

\*Corresponding author

## Supplementary figures

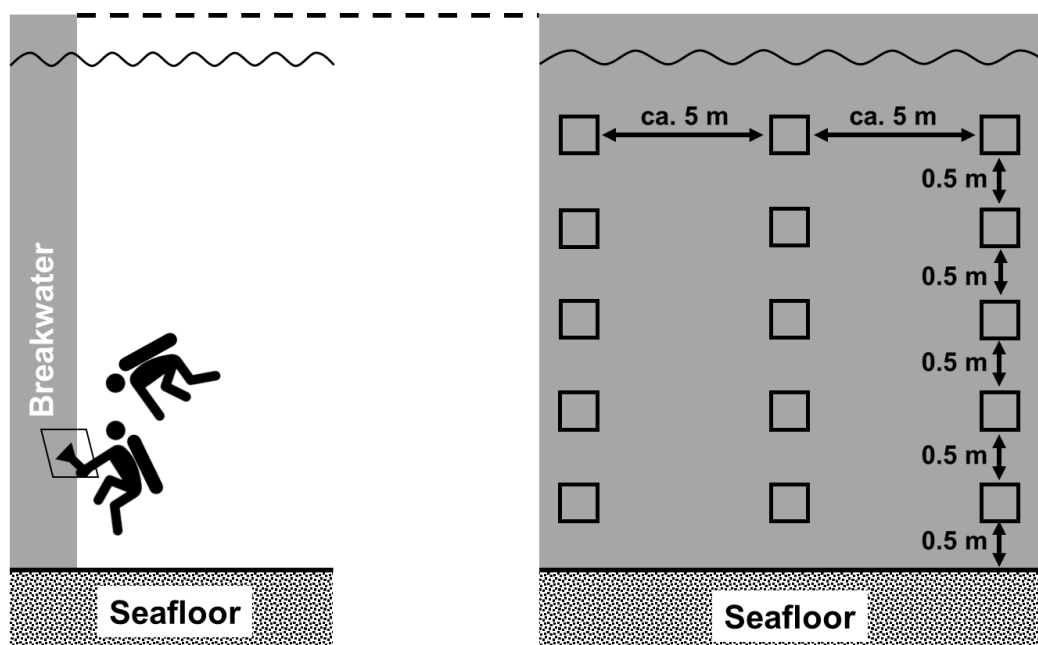

**Figure S1.** Schematic diagram showing the arrangement of sampling points (unfilled squares) at the breakwater wall habitat. The left panel shows a cross-sectional view and the right panel a plan view of the breakwater wall.

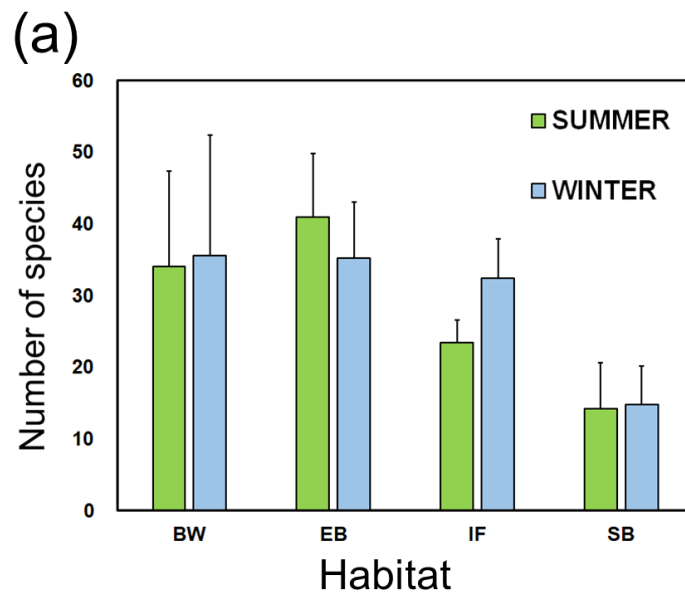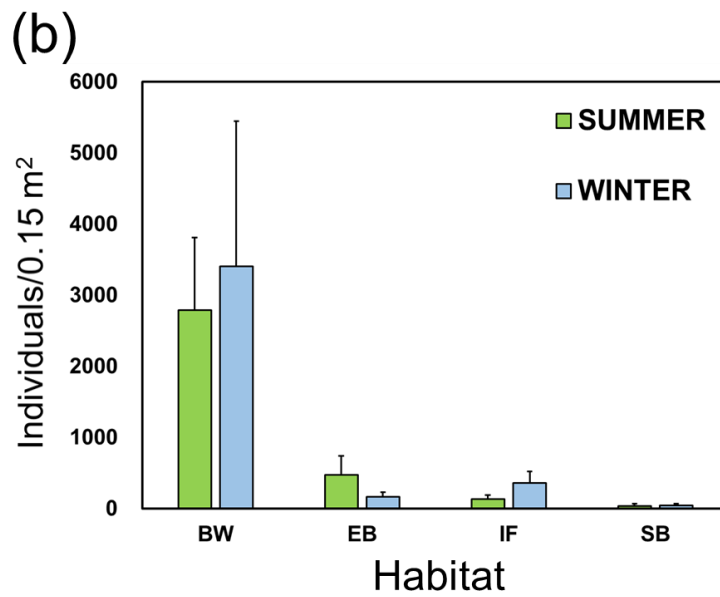

**Figure S2.** Mean (a) species richness and (b) total abundances at each habitat. Error bars show standard deviations. Habitat abbreviations are as in Fig. 1.

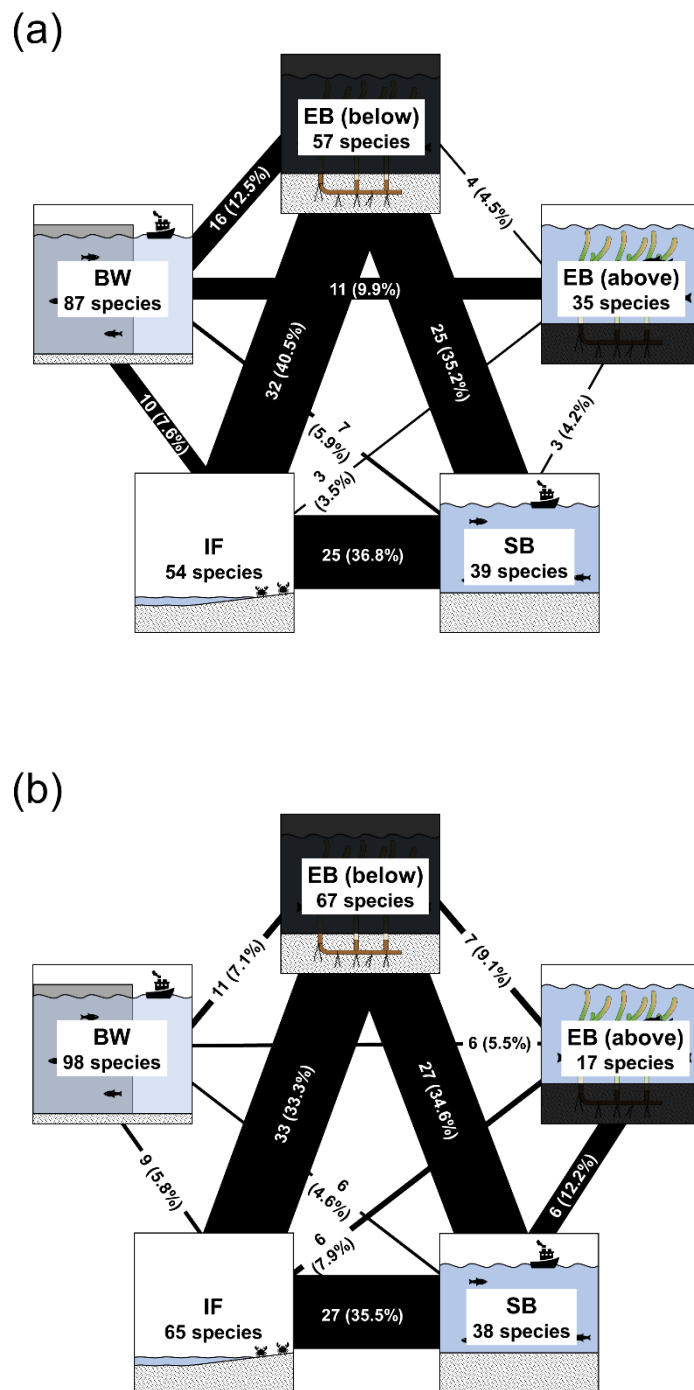

**Figure S3.** Shared species among habitat pairs in (a) summer and (b) winter. The eelgrass bed (EB) was separated into above- and belowground communities. Black numbers in each box indicate total numbers of species collected in each habitat. White or black

numbers on the black lines indicate the numbers of species that were shared between each habitat pair, with percentages based on Jaccard indices shown in parentheses. The thickness of each black line is proportional to the percentage of species shared. Habitat abbreviations are as shown in Fig. 1.

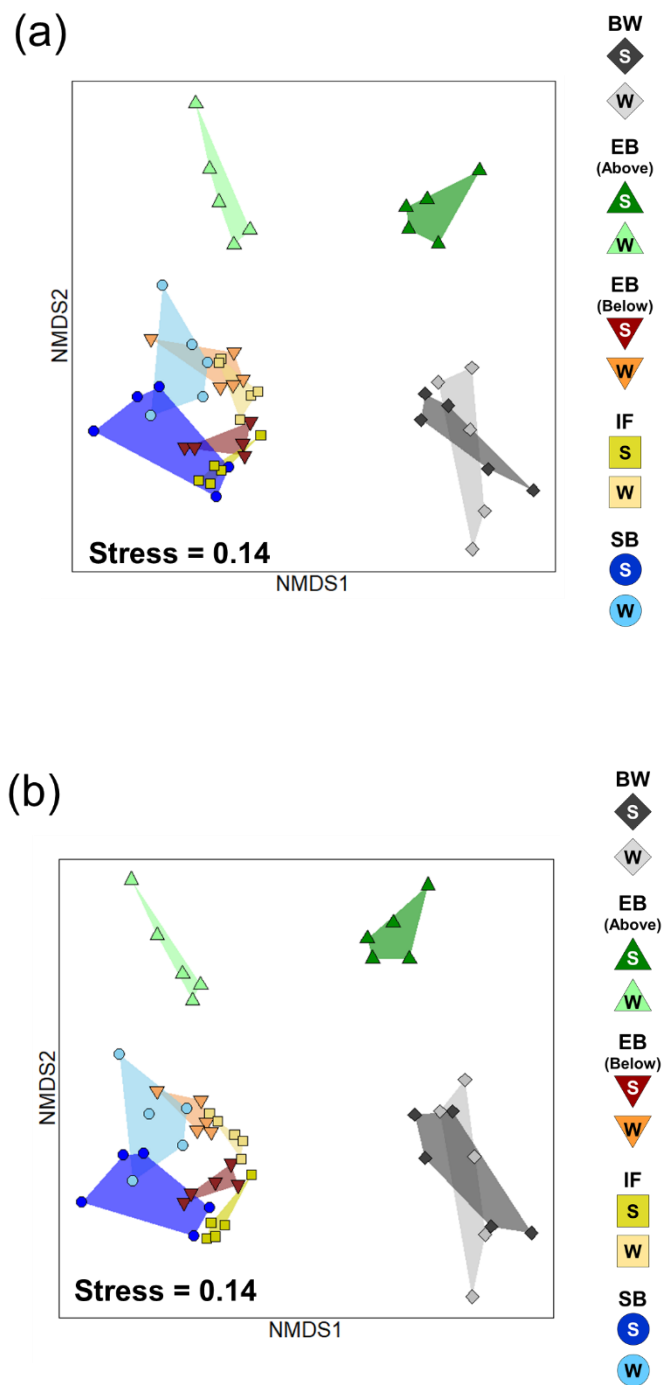

**Figure S4.** Non-metric multidimensional scaling (NMDS) ordinations of (a) species compositions based on Jaccard dissimilarities calculated from presence/absence data, and (b) species compositions and abundances based on Bray–Curtis dissimilarities calculated

from fourth-root transformed abundance data. The four different symbols indicate subsites in each habitat. Convex hulls enclosed by symbols indicate the dispersion of community composition within habitats. Habitat abbreviations are as shown in Fig. 1.

## Supplementary tables

**Table S1.** Water, sediment, and eelgrass conditions (mean  $\pm$  standard deviation) at each habitat in summer and winter. ORP: oxidation-reduction potential; D<sub>50</sub>: median particle size. Habitat abbreviations are as in Fig. 1.

| <b>Factor</b>              | <b>BW</b> | <b>EB</b>       | <b>IF</b>       | <b>SB</b>       |
|----------------------------|-----------|-----------------|-----------------|-----------------|
| <b>Water conditions</b>    |           |                 |                 |                 |
| <i>Summer</i>              |           |                 |                 |                 |
| Water temperature (°C)     | 27.2      | 27.2 $\pm$ 0.3  | 27.2 $\pm$ 0.1  | 27.2 $\pm$ 0.6  |
| Salinity (psu)             | 30.9      | 30.7 $\pm$ 0.1  | 30.8 $\pm$ 0.1  | 31.3 $\pm$ 0.2  |
| pH                         | 8.1       | 8.1 $\pm$ 0.1   | 8.1 $\pm$ 0.0   | 8.0 $\pm$ 0.1   |
| Dissolved oxygen (mg/L)    | 6.5       | 5.3 $\pm$ 0.2   | 6.2 $\pm$ 0.4   | 4.9 $\pm$ 1.0   |
| <i>Winter</i>              |           |                 |                 |                 |
| Water temperature (°C)     | 11.9      | 13.5 $\pm$ 0.2  | 10.5 $\pm$ 0.3  | 12.2 $\pm$ 0.7  |
| Salinity (psu)             | 31.4      | 30.8 $\pm$ 0.1  | 30.9 $\pm$ 0.1  | 31.3 $\pm$ 0.2  |
| pH                         | 8.3       | 8.3 $\pm$ 0.0   | 8.4 $\pm$ 0.1   | 8.3 $\pm$ 0.0   |
| Dissolved oxygen (mg/L)    | 9.3       | 8.6 $\pm$ 0.2   | 9.3 $\pm$ 0.1   | 9.2 $\pm$ 0.5   |
| <b>Sediment conditions</b> |           |                 |                 |                 |
| <i>Summer</i>              |           |                 |                 |                 |
| Sediment temperature (°C)  | —         | 26.6 $\pm$ 0.6  | 27.4 $\pm$ 0.9  | 26.7 $\pm$ 0.1  |
| pH                         | —         | 7.6 $\pm$ 0.1   | 7.6 $\pm$ 0.1   | 7.6 $\pm$ 0.0   |
| ORP (mV)                   | —         | -197 $\pm$ 39   | -189 $\pm$ 23   | -168 $\pm$ 13   |
| Water content (%)          | —         | 52.4 $\pm$ 20.3 | 41.5 $\pm$ 20.2 | 59.7 $\pm$ 8.8  |
| D <sub>50</sub> (mm)       | —         | 0.02 $\pm$ 0.01 | 0.08 $\pm$ 0.09 | 0.01 $\pm$ 0.00 |
| <i>Winter</i>              |           |                 |                 |                 |
| Sediment temperature (°C)  | —         | 13.1 $\pm$ 0.2  | 9.8 $\pm$ 0.4   | 11.9 $\pm$ 1.7  |
| pH                         | —         | 7.7 $\pm$ 0.1   | 7.5 $\pm$ 0.1   | 7.4 $\pm$ 0.1   |
| ORP (mV)                   | —         | -123 $\pm$ 6    | -150 $\pm$ 60   | -167 $\pm$ 28   |
| Water content (%)          | —         | 47.7 $\pm$ 21.6 | 43.8 $\pm$ 17.4 | 59.7 $\pm$ 18.9 |
| D <sub>50</sub> (mm)       | —         | 0.02 $\pm$ 0.01 | 0.02 $\pm$ 0.01 | 0.01 $\pm$ 0.00 |



**Table S1. Continued.**

| <b>Factor</b>                          | <b>BW</b> | <b>EB</b>    | <b>IF</b> | <b>SB</b> |
|----------------------------------------|-----------|--------------|-----------|-----------|
| <b>Eelgrass conditions</b>             |           |              |           |           |
| <i>Summer</i>                          |           |              |           |           |
| Shoot density (inds. m <sup>-2</sup> ) | —         | 45.0 ± 17.3  | —         | —         |
| Shoot mass (wet g m <sup>-2</sup> )    | —         | 132.9 ± 84.5 | —         | —         |
| <i>Winter</i>                          |           |              |           |           |
| Shoot density (inds. m <sup>-2</sup> ) | —         | 87.0 ± 20.2  | —         | —         |
| Shoot mass (wet g m <sup>-2</sup> )    | —         | 5.1 ± 2.7    | —         | —         |

**Table S2.** Species list with abundances and functional traits (PFT: primary feeding type; CLF: common life form) across habitats and seasons.

Species marked “(D)” were deemed dominant species for functional composition analysis. Functional groups are abbreviated as follows:

**Primary feeding types:** *Ca*, carnivore; *Dp*, deposit feeder; *Dt*, detritus feeder; *FS*, filter/suspension feeder; *Gr*, grazer; *He*, herbivore; *Om*, omnivore; *Sc*, scavenger; *Sy*, symbiont. **Common life forms:** *BU*, burrowing; *FL*, free-living; *PA*, parasite; *SE*, sedentary; *TM*, tube/mucus-sheath building. Habitat abbreviations are as shown in Fig. 1.

| Species                            | SUMMER |    |    |    | WINTER |    |    |    | Functional traits |     |           |
|------------------------------------|--------|----|----|----|--------|----|----|----|-------------------|-----|-----------|
|                                    | BW     | EB | IF | SB | BW     | EB | IF | SB | PFT               | CLF | Reference |
| <b>Polychaeta</b>                  |        |    |    |    |        |    |    |    |                   |     |           |
| Ampharetidae sp. (D)               |        |    | 9  | 6  |        |    | 1  | 1  | Dp                | TM  | e         |
| Amphinomidae sp. (D)               |        |    |    | 1  |        |    |    |    | Ca                | FL  | e         |
| <i>Armandia lanceolata</i> (D)     |        | 2  | 9  |    |        |    |    |    | Dp                | FL  | e         |
| <i>Asychis disparidentata</i>      |        | 2  | 1  |    |        | 1  |    |    |                   |     |           |
| <i>Branchiomma cingulatum</i>      | 8      | 1  |    |    | 4      |    |    |    |                   |     |           |
| Capitellidae sp. (D)               | 1      | 27 | 9  | 7  |        | 11 | 8  | 2  | Dp                | TM  | e         |
| Chaetopteridae sp. (D)             |        |    | 1  |    |        |    | 1  | 2  | Dp                | TM  | e         |
| <i>Chone</i> sp. (D)               |        | 5  | 1  | 1  |        | 2  | 28 |    | FS                | SE  | e         |
| Chrysopetalidae sp.                |        | 3  | 1  |    | 29     |    | 2  |    |                   |     |           |
| Cirratulidae sp. (D)               | 496    | 1  |    |    | 153    |    | 6  |    | Dp                | FL  | e         |
| <i>Cirriformia tentaculata</i> (D) | 100    |    |    |    | 276    |    |    |    | Dp                | FL  | e         |

**Table S2.** *Continued.*

| Species                          | SUMMER |    |    |    | WINTER |    |    |    | Functional traits |     |           |
|----------------------------------|--------|----|----|----|--------|----|----|----|-------------------|-----|-----------|
|                                  | BW     | EB | IF | SB | BW     | EB | IF | SB | PFT               | CLF | Reference |
| Dorvilleidae spp.                |        | 1  |    |    | 17     |    |    |    |                   |     |           |
| <i>Eteone longa</i> (D)          |        |    |    |    |        | 5  | 8  | 2  | Ca                | FL  | e         |
| <i>Eulalia viridis</i> (D)       |        | 1  |    |    | 1      | 14 | 3  | 5  | Ca                | FL  | e         |
| <i>Eunice</i> sp.                | 3      |    |    |    |        |    |    |    |                   |     |           |
| Eunicidae sp.                    |        |    |    |    | 2      |    |    |    |                   |     |           |
| Flabelligeridae sp. (D)          |        | 1  | 18 | 1  |        |    | 1  |    | Dp                | TM  | e         |
| <i>Glycera chirori</i> (D)       |        | 9  | 10 | 6  |        | 4  | 6  | 2  | Ca                | BU  | e         |
| <i>Glycera</i> sp.               |        | 2  | 1  |    |        | 1  |    |    |                   |     |           |
| Glyceridae sp.                   |        |    |    |    |        | 1  |    |    |                   |     |           |
| <i>Goniada</i> sp. (D)           |        |    |    |    |        | 7  | 52 | 6  | Ca                | BU  | e         |
| <i>Hemipodia</i> sp. (D)         |        |    | 17 |    |        | 2  |    | 1  | Ca                | BU  | e         |
| Hesionidae sp. (D)               | 15     | 1  | 3  | 3  | 1      | 7  | 10 | 1  | Ca                | FL  | c; e      |
| <i>Hydroides ezoensis</i> (D)    | 78     |    |    |    | 240    |    |    |    | FS                | SE  | e         |
| <i>Hydroides</i> sp.             | 3      |    |    |    |        |    |    |    |                   |     |           |
| <i>Lagis bocki</i> (D)           |        | 2  | 5  |    |        | 2  | 2  | 2  | Dp                | TM  | e         |
| <i>Lepidonotus elongatus</i> (D) | 321    |    |    |    | 165    |    |    |    | Ca                | FL  | e; h      |
| <i>Lepidonotus tenuisetosus</i>  |        |    |    |    | 30     |    |    |    |                   |     |           |
| Lumbrineridae sp.                |        |    | 1  |    | 1      |    |    |    |                   |     |           |
| <i>Lysidice collaris</i>         | 4      |    |    |    | 4      |    |    |    |                   |     |           |

**Table S2.** *Continued.*

| Species                               | SUMMER |     |    |    | WINTER |    |    |    | Functional traits |     |           |
|---------------------------------------|--------|-----|----|----|--------|----|----|----|-------------------|-----|-----------|
|                                       | BW     | EB  | IF | SB | BW     | EB | IF | SB | PFT               | CLF | Reference |
| <i>Maldanidae</i> sp. (D)             |        | 17  |    |    |        | 1  | 1  |    | Dp                | TM  | e; g; j   |
| <i>Neanthes acuminata</i> (D)         |        | 8   |    |    |        | 9  |    |    | Om                | TM  | e         |
| <i>Nectoneanthes oxypoda</i> (D)      |        |     |    |    |        | 24 |    | 6  | Om                | TM  | e         |
| <i>Nectoneanthes</i> sp. (D)          |        |     |    | 1  |        |    |    |    | Om                | TM  | e         |
| Nephtyidae sp. (D)                    |        |     |    |    |        |    |    | 1  | Ca                | FL  | e; j      |
| <i>Nephtys</i> sp. (D)                |        | 3   | 5  | 5  |        | 25 | 45 | 23 | Ca                | FL  | e; j      |
| <i>Nereiphylla castanea</i>           | 60     |     |    |    | 36     |    |    |    |                   |     |           |
| <i>Nereis</i> sp.                     |        |     |    |    | 10     |    |    |    |                   |     |           |
| <i>Notomastus latericeus</i> (D)      |        | 1   | 8  |    |        |    | 9  | 1  | Dp                | TM  | e         |
| Opheliidae sp.                        |        |     |    |    |        | 1  | 10 |    |                   |     |           |
| Orbiniidae sp.                        |        |     | 1  |    |        | 2  |    |    |                   |     |           |
| <i>Oxydromus angustifrons</i> (D)     |        |     | 6  | 1  |        |    | 4  |    | Ca                | FL  | c; e      |
| Paraonidae sp.                        |        | 3   |    |    |        | 1  |    |    |                   |     |           |
| <i>Perinereis cultrifera</i>          | 22     |     |    |    | 1      | 1  |    |    |                   |     |           |
| <i>Perinereis nuntia brevicirris</i>  |        |     |    |    | 1      |    |    |    |                   |     |           |
| <i>Phyllodoce maculata</i> (D)        |        | 5   |    |    |        | 10 |    |    | Ca                | FL  | e         |
| Phyllodocidae sp.                     | 2      | 7   |    |    | 5      | 3  |    |    |                   |     |           |
| <i>Platynereis bicanaliculata</i> (D) |        | 32  |    |    |        | 3  |    |    | Om                | TM  | e         |
| <i>Platynereis</i> sp. (D)            | 16     | 104 |    |    |        | 1  |    |    | Om                | TM  | e         |

**Table S2.** *Continued.*

| Species                                   | SUMMER |     |    |    | WINTER |     |     |    | Functional traits |     |            |
|-------------------------------------------|--------|-----|----|----|--------|-----|-----|----|-------------------|-----|------------|
|                                           | BW     | EB  | IF | SB | BW     | EB  | IF  | SB | PFT               | CLF | Reference  |
| Poecilochaetidae sp. (D)                  |        | 1   | 1  | 3  |        |     | 2   | 1  | FS                | TM  | e          |
| Polynoidae sp.                            | 49     | 3   | 1  |    | 17     | 3   | 6   |    |                   |     |            |
| <i>Polyophthalmus pictus</i>              |        | 3   |    |    | 1      |     |     |    |                   |     |            |
| <i>Praxillella affinis pacifica</i> (D)   |        | 19  | 75 | 30 |        | 3   | 21  |    | Dp                | TM  | e; g; j    |
| <i>Prionospio pulchra</i>                 |        |     |    |    |        | 1   |     |    |                   |     |            |
| <i>Prionospio</i> sp. (D)                 |        | 1   |    |    |        | 9   | 1   | 6  | Dp                | TM  | e          |
| <i>Pseudopolydora kemp</i> (D)            |        |     |    |    |        | 50  |     |    | Dp                | TM  | e          |
| <i>Pseudopolydora paucibranchiata</i> (D) |        |     |    |    |        | 64  |     |    | Dp                | TM  | e          |
| <i>Pseudopolydora</i> sp. (D)             | 254    | 2   | 4  |    | 613    | 14  | 148 | 17 | Dp                | TM  | e          |
| <i>Pseudopotamilla</i> sp. (D)            | 743    |     |    |    | 932    |     |     |    | FS                | SE  | e          |
| Sabellariidae sp.                         |        |     |    |    |        |     | 1   |    |                   |     |            |
| Sabellida sp.                             |        | 10  |    |    |        |     |     |    |                   |     |            |
| Sabellidae sp. (D)                        | 4      | 6   |    |    | 190    | 5   | 7   | 1  | FS                | SE  | e          |
| <i>Scolelepis</i> sp. (D)                 | 1      | 2   | 3  | 1  |        | 3   | 1   |    | Dp                | TM  | e          |
| <i>Scoletoma longifolia</i> (D)           |        | 168 | 38 | 20 |        | 127 | 38  | 5  | Ca                | BU  | e          |
| Serpulidae sp.                            | 9      |     |    |    | 20     |     |     |    |                   |     |            |
| Sigalionidae sp. (D)                      |        | 4   | 2  | 9  |        | 13  | 4   | 16 | Ca                | FL  | e          |
| <i>Sigambra</i> sp. (D)                   |        | 3   |    | 3  |        | 5   | 21  | 9  | Om                | FL  | c; e; h; j |
| <i>Simplisetia erythraeensis</i> (D)      |        |     | 19 |    |        | 2   | 1   |    | Om                | TM  | e          |
| Spionidae sp.                             |        | 4   |    |    |        |     |     |    |                   |     |            |

**Table S2.** *Continued.*

| Species                           | SUMMER |    |    |    | WINTER |     |     |    | Functional traits |     |                        |
|-----------------------------------|--------|----|----|----|--------|-----|-----|----|-------------------|-----|------------------------|
|                                   | BW     | EB | IF | SB | BW     | EB  | IF  | SB | PFT               | CLF | Reference              |
| <i>Spirobranchus kraussii</i> (D) | 1157   |    |    |    | 1584   |     |     |    | FS                | SE  | e                      |
| <i>Spirobranchus tetraceros</i>   | 3      |    |    |    | 5      |     |     |    |                   |     |                        |
| <i>Sternaspis scutata</i> (D)     |        |    |    | 10 |        | 43  |     | 1  | Dp                | BU  | j; p (cf. Terebellida) |
| Syllidae sp. (D)                  | 5      | 8  |    |    | 144    |     |     |    | Ca                | TM  | c; e                   |
| <i>Syllis</i> sp. (D)             | 535    |    |    |    |        | 9   | 1   | 6  | Dp                | TM  | e                      |
| Terebellidae sp. (D)              | 834    | 2  |    |    | 879    | 1   |     |    | Dp                | TM  | e                      |
| <i>Thelepus setosus</i>           |        |    |    |    | 28     |     |     |    |                   |     |                        |
| <b>Amphipoda</b>                  |        |    |    |    |        |     |     |    |                   |     |                        |
| <i>Ampithoe</i> sp.               | 3      |    |    |    | 9      |     |     |    |                   |     |                        |
| <i>Ampithoidae</i> sp.            |        | 4  |    |    |        |     |     |    |                   |     |                        |
| Aoridae sp.                       |        | 5  |    |    |        |     |     |    |                   |     |                        |
| <i>Aoroides columbiae</i> (D)     |        |    |    |    |        | 155 | 9   | 2  | Om                | TM  | c; n; p                |
| <i>Byblis japonicus</i>           |        | 3  |    |    |        | 3   |     |    |                   |     |                        |
| <i>Caprella</i> sp. (D)           |        | 6  |    |    | 8      | 4   |     |    | FS                | FL  | c; n; p                |
| Corophiidae sp. (D)               |        |    |    |    |        | 1   |     | 1  | FS                | TM  | c; n                   |
| <i>Corophium</i> sp. (D)          |        |    | 2  |    |        |     | 210 |    | FS                | TM  | c; n                   |
| <i>Dexaminidae</i> sp.            |        | 2  |    |    |        |     |     |    |                   |     |                        |
| <i>Erichthonius pugnax</i> (D)    | 3      | 1  |    |    |        |     |     | 2  | FS                | TM  | c; p                   |
| <i>Grandidierella japonica</i>    |        |    |    |    |        |     | 9   |    |                   |     |                        |
| <i>Hyale</i> sp.                  | 1      |    |    |    | 9      |     |     |    |                   |     |                        |

**Table S2.** *Continued.*

| Species                              | SUMMER |     |    |    | WINTER |    |    |    | Functional traits |     |                       |
|--------------------------------------|--------|-----|----|----|--------|----|----|----|-------------------|-----|-----------------------|
|                                      | BW     | EB  | IF | SB | BW     | EB | IF | SB | PFT               | CLF | Reference             |
| Leucothoidae sp.                     |        |     |    |    | 6      |    |    |    |                   |     |                       |
| <i>Monocorophium acherusicum</i> (D) | 145    |     |    |    | 3071   |    |    |    | FS                | TM  | c; n                  |
| <i>Nippopisella nagatai</i> (D)      |        |     | 34 | 1  |        |    | 6  |    | He                | FL  | c; p (cf. Hadzioidea) |
| Oedicerotidae sp.                    |        |     |    |    |        | 2  |    |    |                   |     |                       |
| <b>Cumacea</b>                       |        |     |    |    |        |    |    |    |                   |     |                       |
| <i>Dimorphostylis</i> sp.            |        |     |    |    |        | 1  | 1  |    |                   |     |                       |
| <b>Isopoda</b>                       |        |     |    |    |        |    |    |    |                   |     |                       |
| <i>Dynoides dentisinus</i>           | 3      |     |    |    | 1      |    |    |    |                   |     |                       |
| <i>Gnorimosphaeroma rayi</i> (D)     | 3      |     |    |    | 192    | 1  |    |    | Om                | FL  | m                     |
| <i>Ianiropsis longiantennata</i>     |        |     |    |    | 4      |    |    |    |                   |     |                       |
| <i>Ligia</i> sp.                     | 6      |     |    |    |        |    |    |    |                   |     |                       |
| Munnidae sp.                         |        |     |    |    | 32     |    |    |    |                   |     |                       |
| <i>Paranthuridae</i> sp.             |        | 7   |    |    |        |    |    |    |                   |     |                       |
| <i>Sphaeroma sieboldii</i>           | 168    |     |    |    | 137    |    |    |    |                   |     |                       |
| <b>Tanaidacea</b>                    |        |     |    |    |        |    |    |    |                   |     |                       |
| <i>Zeuxo normani</i> (D)             |        | 307 |    |    |        |    |    |    | FS                | TM  | c; d (cf. Tanaidacea) |
| <b>Ostracoda</b>                     |        |     |    |    |        |    |    |    |                   |     |                       |
| Myodocopina sp.                      |        | 11  |    |    | 7      | 1  |    |    |                   |     |                       |
| Podocopida sp. (D)                   |        | 32  |    |    |        | 1  |    |    | Om                | FL  | c; p                  |
| <i>Vargula hilgendorffii</i> (D)     |        | 7   | 1  |    |        | 3  |    |    | Om                | FL  | c; p                  |

**Table S2.** *Continued.*

| Species                             | SUMMER |     |    |    | WINTER |    |    |    | Functional traits |     |                        |
|-------------------------------------|--------|-----|----|----|--------|----|----|----|-------------------|-----|------------------------|
|                                     | BW     | EB  | IF | SB | BW     | EB | IF | SB | PFT               | CLF | Reference              |
| <b>Hexanauplia</b>                  |        |     |    |    |        |    |    |    |                   |     |                        |
| Harpacticoida sp.                   |        |     |    |    |        | 5  |    |    |                   |     |                        |
| Porcellidiidae sp. (D)              |        | 550 |    |    |        |    |    |    | Dt; Gr            | FL  | c; p                   |
| <b>Decapoda</b>                     |        |     |    |    |        |    |    |    |                   |     |                        |
| Alpheidae sp.                       | 4      | 2   |    |    |        |    |    |    |                   |     |                        |
| <i>Actaea</i> sp.                   | 1      |     |    |    |        |    |    |    |                   |     |                        |
| <i>Alpheus brevicristatus</i>       |        |     |    |    |        |    |    | 1  |                   |     |                        |
| <i>Alpheus</i> sp. (D)              |        |     | 7  | 2  | 3      |    |    |    | Om                | FL  | k; p (cf. Caridea)     |
| <i>Athanas</i> sp. (D)              |        | 4   | 8  | 1  |        |    | 1  |    | Om                | FL  | k; p (cf. Caridea)     |
| <i>Camptandrium sexdentatum</i> (D) |        | 2   | 31 | 5  |        | 1  | 4  |    | Om                | BU  | k; p (cf. Pleocyemata) |
| <i>Charybdis japonica</i>           | 1      |     |    |    |        |    |    |    |                   |     |                        |
| <i>Charybdis</i> sp.                |        |     | 1  |    |        |    |    |    |                   |     |                        |
| Decapoda sp.                        |        | 2   |    |    |        |    |    |    |                   |     |                        |
| <i>Hayashidonus japonicus</i>       |        | 1   |    |    |        |    |    |    |                   |     |                        |
| <i>Hexapinus</i> sp. (D)            |        |     |    | 2  |        |    |    |    | Om                | PA  | i; p (cf. Pleocyemata) |
| Hexapodidae sp.                     |        |     |    | 1  |        |    | 1  |    |                   |     |                        |
| <i>Latreutes laminirostris</i>      |        | 1   |    |    |        |    |    |    |                   |     |                        |
| <i>Latreutes planirostris</i>       |        |     |    |    |        |    | 1  |    |                   |     |                        |
| <i>Latreutes</i> sp.                |        |     |    |    | 1      |    |    |    |                   |     |                        |
| <i>Macromedaeus distinguendus</i>   | 154    |     |    |    | 134    |    |    |    |                   |     |                        |



**Table S2.** *Continued.*

| Species                                 | SUMMER |    |    |    | WINTER |    |    |    | Functional traits |     |                           |
|-----------------------------------------|--------|----|----|----|--------|----|----|----|-------------------|-----|---------------------------|
|                                         | BW     | EB | IF | SB | BW     | EB | IF | SB | PFT               | CLF | Reference                 |
| <i>Macrophthalmus</i> sp.               |        |    |    |    |        |    | 6  |    |                   |     |                           |
| Majidae sp.                             | 1      | 2  |    |    |        |    |    |    |                   |     |                           |
| <i>Nanosesarma minutum</i> (D)          | 216    |    |    |    | 263    |    |    |    | Om                | FL  | k; p (cf. Pleocyemata)    |
| Ocypodidae sp. (D)                      |        |    |    | 1  |        |    |    |    | Om                | BU  | k; p (cf. Pleocyemata)    |
| <i>Ogyrides striaticauda</i> (D)        |        |    | 8  |    |        |    | 6  |    | Om                | FL  | p (cf. Caridea)           |
| Paguridae sp.                           | 8      |    |    |    | 2      |    |    |    |                   |     |                           |
| <i>Petrolisthes</i> sp. (D)             | 254    |    |    |    | 69     |    |    |    | FS                | FL  | c; k                      |
| <i>Pilumnopus makianus</i>              | 9      |    |    |    |        |    |    |    |                   |     |                           |
| <i>Pilumnus minutus</i>                 | 1      |    |    |    | 23     |    |    |    |                   |     |                           |
| <i>Pinnotheres</i> sp.                  |        |    |    |    |        | 1  |    |    |                   |     |                           |
| Pinnotheridae sp. (D)                   |        | 4  | 1  | 2  |        |    |    |    | Om                | PA  | c; k; p (cf. Pleocyemata) |
| Porcellanidae sp.                       |        |    | 1  |    |        |    |    |    |                   |     |                           |
| <i>Portunus</i> sp.                     |        |    | 1  |    |        |    |    |    |                   |     |                           |
| <i>Pseudopinnixa carinata</i>           |        |    |    |    |        |    | 1  |    |                   |     |                           |
| <i>Raphidopus ciliatus</i> (D)          |        |    | 1  | 4  |        |    |    |    | FS                | FL  | c; k                      |
| <i>Sphaerozius nitidus</i>              |        |    |    |    | 1      |    |    |    |                   |     |                           |
| <i>Thalamita sima</i>                   | 1      |    |    |    |        |    |    |    |                   |     |                           |
| <i>Typhlocarcinus</i> sp.               |        |    | 1  |    |        |    |    |    |                   |     |                           |
| <i>Upogebia major</i>                   |        |    |    |    |        | 1  |    |    |                   |     |                           |
| Xanthidae sp. (D)                       | 92     |    |    |    | 98     |    |    |    | Om                | FL  | k; p (cf. Pleocyemata)    |
| <i>Xenophthalmus pinnotheroides</i> (D) |        | 3  | 2  | 2  |        | 1  | 1  | 1  | Om                | FL  | a; p (cf. Pleocyemata)    |

Table S2. Continued.

| Species                                | SUMMER |    |     |    | WINTER |    |    |    | Functional traits |     |                            |
|----------------------------------------|--------|----|-----|----|--------|----|----|----|-------------------|-----|----------------------------|
|                                        | BW     | EB | IF  | SB | BW     | EB | IF | SB | PFT               | CLF | Reference                  |
| <b>Stomatopoda</b>                     |        |    |     |    |        |    |    |    |                   |     |                            |
| <i>Oratosquilla oratoria</i>           |        |    |     |    |        |    |    | 1  |                   |     |                            |
| <b>Sessilia</b>                        |        |    |     |    |        |    |    |    |                   |     |                            |
| <i>Amphibalanus amphitrite</i> (D)     | 2422   |    | 1   |    | 1586   |    |    |    | FS                | SE  | c; k; p (cf. Balanomorpha) |
| <i>Amphibalanus eburneus</i>           | 56     |    |     |    | 2      |    |    |    |                   |     |                            |
| <i>Amphibalanus reticulatus</i> (D)    | 67     |    | 136 |    | 12     |    |    |    | FS                | SE  | c; k; p (cf. Balanomorpha) |
| <i>Balanus trigonus</i> (D)            | 2121   |    |     |    | 1001   |    |    |    | FS                | SE  | c; k; p (cf. Balanomorpha) |
| <i>Chthamalus challenger</i>           | 128    |    |     |    | 36     |    |    |    |                   |     |                            |
| <i>Fistulobalanus albicostatus</i> (D) | 1123   |    |     |    | 1374   |    |    |    | FS                | SE  | c; k; p (cf. Balanomorpha) |
| <b>Collembola</b>                      |        |    |     |    |        |    |    |    |                   |     |                            |
| Collembola sp.                         |        |    |     |    | 1      |    |    |    |                   |     |                            |
| <b>Insecta</b>                         |        |    |     |    |        |    |    |    |                   |     |                            |
| Chironomidae sp. (D)                   |        |    |     |    | 72     |    |    |    | Om                | FL  | b; c; f; o                 |
| Tipulidae sp.                          |        |    |     |    | 76     |    |    |    |                   |     |                            |
| <b>Gastropoda</b>                      |        |    |     |    |        |    |    |    |                   |     |                            |
| Aplysiidae sp.                         |        | 8  |     |    |        |    |    |    |                   |     |                            |
| Cerithiidae sp.                        |        |    |     |    | 46     |    |    |    |                   |     |                            |
| <i>Alaba</i> sp. (D)                   |        | 36 |     |    |        |    |    |    | Dt                | FL  | c (cf. Cerithioidea); l    |
| <i>Alvania concinna</i>                |        | 10 |     |    | 2      |    |    |    |                   |     |                            |
| <i>Bedevina birileffi</i> (D)          | 18     | 3  |     | 2  | 60     |    |    |    | Ca-Sc             | FL  | c; l; p                    |

**Table S2.** *Continued.*

| Species                           | SUMMER |    |    |    | WINTER |    |     |    | Functional traits |     |           |
|-----------------------------------|--------|----|----|----|--------|----|-----|----|-------------------|-----|-----------|
|                                   | BW     | EB | IF | SB | BW     | EB | IF  | SB | PFT               | CLF | Reference |
| <i>Cantharidus japonicus</i>      |        | 2  |    |    |        |    |     |    |                   |     |           |
| <i>Cellana toreuma</i>            | 1      |    |    |    |        |    |     |    |                   |     |           |
| Columbellidae sp.                 |        | 9  |    |    |        |    |     |    |                   |     |           |
| <i>Cylichnatys angusta</i> (D)    |        |    |    |    |        |    | 121 |    | Gr                | FL  | c; l; p   |
| <i>Decorifer insignis</i> (D)     |        |    |    |    |        |    | 62  |    | Ca                | FL  | c; l; p   |
| <i>Diala semistriata</i>          |        | 6  |    |    | 1      |    |     |    |                   |     |           |
| <i>Drupella margariticola</i> (D) |        |    |    |    |        | 4  |     | 1  | Ca-Sc             | FL  | c; l; p   |
| <i>Elysia</i> sp.                 |        |    |    |    | 2      |    |     |    |                   |     |           |
| <i>Erato</i> sp.                  | 1      | 1  |    |    |        |    |     |    |                   |     |           |
| <i>Ergalatax</i> sp.              | 1      |    |    |    |        |    |     |    |                   |     |           |
| Gastropoda sp.                    |        | 17 |    |    |        |    |     |    |                   |     |           |
| Haminoeidae sp. (D)               |        | 1  |    |    |        | 4  |     |    | Gr                | FL  | c; l; p   |
| <i>Lacuna</i> sp.                 |        |    |    |    |        | 1  |     |    |                   |     |           |
| <i>Littoraria articulata</i>      |        |    |    |    | 16     |    |     |    |                   |     |           |
| <i>Littoraria</i> sp.             | 1      |    |    |    |        |    |     |    |                   |     |           |
| <i>Littorina brevicula</i> (D)    | 145    |    |    |    | 188    |    |     |    | Gr                | FL  | c; l      |
| <i>Mitrella bicincta</i>          | 1      |    |    |    |        |    |     |    |                   |     |           |
| <i>Mitrella</i> sp.               |        | 5  |    |    |        |    |     |    |                   |     |           |
| <i>Muricidae</i> sp.              | 1      |    |    |    | 9      |    |     |    |                   |     |           |
| <i>Nassarius livescens</i> (D)    |        | 9  |    | 19 |        | 5  |     | 1  | Sc                | FL  | c; p      |

**Table S2.** *Continued.*

| Species                           | SUMMER |    |    |    | WINTER |    |    |    | Functional traits |     |           |
|-----------------------------------|--------|----|----|----|--------|----|----|----|-------------------|-----|-----------|
|                                   | BW     | EB | IF | SB | BW     | EB | IF | SB | PFT               | CLF | Reference |
| <i>Nassarius multigranulosus</i>  |        |    |    |    |        | 7  |    |    |                   |     |           |
| <i>Nassarius praematuratus</i>    |        |    |    |    |        | 2  |    |    |                   |     |           |
| <i>Nassarius</i> sp.              |        | 6  | 2  |    |        |    |    |    |                   |     |           |
| <i>Notocochlis gualtieriana</i>   |        |    |    |    |        |    | 1  |    |                   |     |           |
| <i>Nudibranchia</i> sp.           |        |    |    |    |        | 1  |    |    |                   |     |           |
| Onchidiidae sp.                   |        |    |    |    | 1      |    |    |    |                   |     |           |
| <i>Peasiella habei</i>            | 160    |    |    |    | 100    |    |    |    |                   |     |           |
| <i>Philine orientalis</i>         |        |    | 1  |    |        |    |    |    |                   |     |           |
| Pyramidellidae sp.                | 1      |    |    |    | 88     |    |    |    |                   |     |           |
| <i>Reishia bronni</i>             |        |    |    |    | 1      |    |    |    |                   |     |           |
| <i>Reishia clavigera</i>          | 10     |    |    |    | 2      |    |    |    |                   |     |           |
| <i>Reticunassa festiva</i> (D)    | 3      | 8  | 6  | 11 |        | 8  | 14 | 4  | Sc                | FL  | c; p      |
| <i>Reticunassa</i> sp.            |        |    |    |    |        | 1  | 1  |    |                   |     |           |
| Rissoidae sp.                     |        | 19 |    |    |        |    |    |    |                   |     |           |
| <i>Siphonaria japonica</i>        |        |    |    |    | 2      |    |    |    |                   |     |           |
| <i>Stenothyra edogawensis</i>     |        |    |    |    |        |    | 1  |    |                   |     |           |
| <i>Thylacodes adamsii</i>         | 51     |    |    |    | 98     |    |    |    |                   |     |           |
| Triphoridae sp.                   |        |    |    |    | 1      |    |    |    |                   |     |           |
| <i>Yokoyamaia ornatissima</i> (D) |        |    |    | 7  |        |    |    |    | Ca                | FL  | c; l; p   |
| <i>Zafra mitriformis</i> (D)      | 20     |    |    |    | 134    |    |    |    | Ca-Sc             | FL  | c; l; p   |
| <i>Zafra</i> sp.                  |        | 8  |    |    |        | 1  |    |    |                   |     |           |

**Table S2.** *Continued.*

| Species                        | SUMMER |     |     |    | WINTER |    |     |    | Functional traits |     |                              |
|--------------------------------|--------|-----|-----|----|--------|----|-----|----|-------------------|-----|------------------------------|
|                                | BW     | EB  | IF  | SB | BW     | EB | IF  | SB | PFT               | CLF | Reference                    |
| <b>Bivalvia</b>                |        |     |     |    |        |    |     |    |                   |     |                              |
| <i>Anomia Chinensis</i>        | 1      |     |     |    | 1      |    |     |    |                   |     |                              |
| <i>Arcuatula senhousia</i> (D) | 27     | 673 | 118 | 3  | 5      | 28 | 716 | 4  | FS                | SE  | c; l                         |
| <i>Bivalvia</i> sp.            |        | 9   |     |    |        |    |     |    |                   |     |                              |
| <i>Chama japonica</i>          | 2      |     |     |    | 3      |    |     |    |                   |     |                              |
| <i>Crassostrea gigas</i>       | 19     |     |     |    |        |    |     |    |                   |     |                              |
| <i>Cyclina sinensis</i>        |        |     |     |    |        |    | 2   |    |                   |     |                              |
| <i>Fulvia hungerfordi</i>      |        |     | 1   |    |        | 3  | 3   | 2  |                   |     |                              |
| <i>Irus irus</i>               | 1      |     |     |    |        |    |     |    |                   |     |                              |
| <i>Irus</i> sp.                | 2      |     |     |    | 1      |    |     |    |                   |     |                              |
| <i>Lasaea undulata</i> (D)     | 1015   |     |     |    | 644    |    |     |    | FS                | BU  | c; l; p (cf. Galeommatoidea) |
| <i>Laternula gracilis</i>      |        |     |     |    |        |    | 10  |    |                   |     |                              |
| <i>Leptomya minuta</i>         |        |     |     |    |        | 1  |     |    |                   |     |                              |
| <i>Leucosphaera oyamai</i>     |        |     |     |    |        | 1  |     |    |                   |     |                              |
| <i>Lima</i> sp.                | 1      |     |     |    |        |    |     |    |                   |     |                              |
| <i>Lutraria sieboldii</i>      |        |     |     |    |        |    | 4   |    |                   |     |                              |
| <i>Macoma incongrua</i>        |        |     |     |    |        |    | 2   |    |                   |     |                              |
| <i>Macoma</i> sp.              |        |     |     |    |        |    | 2   |    |                   |     |                              |
| <i>Moerella rutila</i> (D)     |        |     | 14  |    |        |    | 83  |    | FS-Dp             | BU  | c; l; p                      |
| Mytilidae sp.                  |        |     |     |    | 1      |    |     |    |                   |     |                              |

**Table S2.** *Continued.*

| Species                            | SUMMER |    |    |    | WINTER |    |    |    | Functional traits |       |                     |
|------------------------------------|--------|----|----|----|--------|----|----|----|-------------------|-------|---------------------|
|                                    | BW     | EB | IF | SB | BW     | EB | IF | SB | PFT               | CLF   | Reference           |
| <i>Nitidotellina lischkei</i> (D)  |        | 2  | 2  |    |        | 1  | 3  |    | FS-Dp             | BU    | c; l; p             |
| Ostreidae sp.                      |        |    |    |    | 109    |    |    |    |                   |       |                     |
| <i>Paratapes undulatus</i> (D)     |        |    |    | 3  |        |    |    |    | FS                | BU-SE | c; l                |
| <i>Petricola japonica</i>          |        |    |    |    | 10     |    |    |    |                   |       |                     |
| <i>Petricola</i> sp.               | 12     |    |    |    |        |    |    |    |                   |       |                     |
| <i>Ruditapes philippinarum</i> (D) |        |    | 9  |    |        |    | 8  |    | FS                | BU    | c                   |
| <i>Solemya pusilla</i> (D)         |        | 19 |    | 2  |        |    |    |    | Sy                | BU-SE | l; p                |
| <i>Solen brevissimus</i>           |        |    |    | 1  |        |    |    |    |                   |       |                     |
| <i>Theora lata</i> (D)             |        | 2  | 1  |    |        | 91 | 35 | 88 | Dp                | BU    | c; l; p             |
| Thraciidae sp. (D)                 |        | 1  | 1  | 10 |        |    |    |    | FS                | BU    | c (cf. Bivalvia); p |
| <i>Timoclea micra</i>              |        |    |    |    |        | 1  |    |    |                   |       |                     |
| <i>Xenostrobus atratus</i> (D)     | 577    |    |    |    | 740    |    |    |    | FS                | BU    | c; l                |
| <b>Polyplacophora</b>              |        |    |    |    |        |    |    |    |                   |       |                     |
| <i>Acanthochitona achates</i>      | 35     |    |    |    | 18     |    |    |    |                   |       |                     |
| <i>Liolophura japonica</i>         |        |    |    |    | 1      |    |    |    |                   |       |                     |
| Ischnochitonidae sp.               | 1      |    |    |    |        |    |    |    |                   |       |                     |
| <b>Brachiopoda</b>                 |        |    |    |    |        |    |    |    |                   |       |                     |
| <i>Discradisca</i> sp.             | 7      |    |    |    | 9      |    |    |    |                   |       |                     |
| <b>Echinodermata</b>               |        |    |    |    |        |    |    |    |                   |       |                     |
| <i>Temnopleurus toreumaticus</i>   | 3      |    |    |    |        |    |    |    |                   |       |                     |

**Table S2.** *Continued.*

| Species                                 | SUMMER |    |    |    | WINTER |    |    |    | Functional traits |     |                          |
|-----------------------------------------|--------|----|----|----|--------|----|----|----|-------------------|-----|--------------------------|
|                                         | BW     | EB | IF | SB | BW     | EB | IF | SB | PFT               | CLF | Reference                |
| <i>Amphioplus (Lymanella) japonicus</i> |        |    |    |    |        | 1  |    |    |                   |     |                          |
| <i>Amphiura (Ophiopeltis) aestuarii</i> |        |    |    |    |        |    | 2  |    |                   |     |                          |
| Amphiuridae sp. (D)                     |        | 3  |    | 2  |        |    |    | 1  | Dt                | FL  | c; k                     |
| Ophiothrix sp.                          |        |    |    |    | 4      |    |    |    |                   |     |                          |
| Ophiurida sp.                           |        | 1  |    |    |        | 1  | 14 |    |                   |     |                          |
| Ophiuroidea sp.                         | 2      |    |    |    |        |    |    |    |                   |     |                          |
| Synaptidae sp. (D)                      |        | 6  | 10 | 4  |        | 2  | 3  | 1  | Dt                | BU  | c (cf. Holothuroidea); p |
| <b>Bryozoa</b>                          |        |    |    |    |        |    |    |    |                   |     |                          |
| <i>Watersipora cucullata</i>            | 1      | 1  |    |    | 15     |    |    |    |                   |     |                          |
| <b>Nemertea</b>                         |        |    |    |    |        |    |    |    |                   |     |                          |
| Nemertea sp. (D)                        | 5      | 4  | 6  | 5  | 78     | 4  | 5  | 4  | Ca                | FL  | c; j                     |
| <b>Sipuncula</b>                        |        |    |    |    |        |    |    |    |                   |     |                          |
| Sipuncula sp.                           |        |    |    |    |        |    | 1  | 1  |                   |     |                          |
| <b>Actiniaria</b>                       |        |    |    |    |        |    |    |    |                   |     |                          |
| Actiniaria sp.                          | 13     | 3  |    |    |        |    | 1  |    |                   |     |                          |
| <i>Diadumene lineata</i>                |        |    |    |    | 8      |    |    |    |                   |     |                          |
| <b>Asciidiacea</b>                      |        |    |    |    |        |    |    |    |                   |     |                          |
| Asciidiidae sp.                         |        |    |    |    | 2      |    |    |    |                   |     |                          |
| <i>Polyandrocarpa</i> sp.               |        |    |    |    | 5      |    |    |    |                   |     |                          |
| Pyuridae sp.                            | 2      |    |    |    | 5      |    |    |    |                   |     |                          |

**Table S2.** *Continued.*

| Species                                                   | SUMMER                                                                                                                                                                                                                                                                                                                |    |    |    | WINTER |    |    |    | Functional traits |     |           |
|-----------------------------------------------------------|-----------------------------------------------------------------------------------------------------------------------------------------------------------------------------------------------------------------------------------------------------------------------------------------------------------------------|----|----|----|--------|----|----|----|-------------------|-----|-----------|
|                                                           | BW                                                                                                                                                                                                                                                                                                                    | EB | IF | SB | BW     | EB | IF | SB | PFT               | CLF | Reference |
| <i>Styela plicata</i>                                     | 1                                                                                                                                                                                                                                                                                                                     |    |    |    |        |    |    |    |                   |     |           |
| Styelidae sp.                                             | 1                                                                                                                                                                                                                                                                                                                     |    |    |    |        |    |    |    |                   |     |           |
| <b>Chaetognatha</b>                                       |                                                                                                                                                                                                                                                                                                                       |    |    |    |        |    |    |    |                   |     |           |
| Sagittoidea sp.                                           |                                                                                                                                                                                                                                                                                                                       |    |    |    |        | 3  |    |    |                   |     |           |
| <b>Platyhelminthes</b>                                    |                                                                                                                                                                                                                                                                                                                       |    |    |    |        |    |    |    |                   |     |           |
| Platyhelminthes sp. (D)                                   | 112                                                                                                                                                                                                                                                                                                                   | 68 |    |    | 144    |    |    |    | Ca                | FL  | c         |
| <b>Porifera</b>                                           |                                                                                                                                                                                                                                                                                                                       |    |    |    |        |    |    |    |                   |     |           |
| <i>Halichondria (Halichondria) japonica</i>               |                                                                                                                                                                                                                                                                                                                       |    |    |    | 6      |    |    |    |                   |     |           |
| <i>Halichondria (Halichondria) okadai</i>                 |                                                                                                                                                                                                                                                                                                                       |    |    |    | 27     |    |    |    |                   |     |           |
| <b>References for classification of functional groups</b> |                                                                                                                                                                                                                                                                                                                       |    |    |    |        |    |    |    |                   |     |           |
| <b>a.</b>                                                 | Aramaki, Y., Taguchi, K., Hishiki, K., Suda, Y., Murai, T. 2005. Crabs appeared in tidal flat of Okinohata, Yanagawa, Fukuoka prefecture [Japan] and some ecological findings of <i>Xenophthalmus pinnotheroides</i> (in Japanese with English abstract). <i>Journal of National Fisheries University</i> , 53: 9-19. |    |    |    |        |    |    |    |                   |     |           |
| <b>b.</b>                                                 | Brodin, Y., Andersson, M. H. 2009. The marine splash midge <i>Telmatogon japonicus</i> (Diptera; Chironomidae)—extreme and alien? <i>Biological Invasions</i> , 11: 1311-1317.                                                                                                                                        |    |    |    |        |    |    |    |                   |     |           |
| <b>c.</b>                                                 | Carlton, J. T. (ed.). 2007. The light and Smith manual: intertidal invertebrates from Central California to Oregon. 4th edition. <i>Berkeley: University of California Press.</i>                                                                                                                                     |    |    |    |        |    |    |    |                   |     |           |
| <b>d.</b>                                                 | The Encyclopedia of Life. <a href="https://eol.org/">https://eol.org/</a> .                                                                                                                                                                                                                                           |    |    |    |        |    |    |    |                   |     |           |
| <b>e.</b>                                                 | Fauchald, K., Jumars, P. A. 1979. The diet of worms: a study of polychaete feeding guilds. <i>Oceanography and Marine Biology: An Annual Review</i> , 17: 193-284.                                                                                                                                                    |    |    |    |        |    |    |    |                   |     |           |
| <b>f.</b>                                                 | Henriques-Oliveira, A. L., Nessimian, J. L., Dorvillé, L. F. M. 2003. Feeding habits of chironomid larvae (Insecta: Diptera) from a stream in the Floresta da Tijuca, Rio de Janeiro, Brazil. <i>Brazilian Journal of Biology</i> , 63: 269-281.                                                                      |    |    |    |        |    |    |    |                   |     |           |
| <b>g.</b>                                                 | ImajimaM (ed.). 1996. Polychaetous Annelids. <i>Tokyo: Aquabiology.</i>                                                                                                                                                                                                                                               |    |    |    |        |    |    |    |                   |     |           |
| <b>h.</b>                                                 | ImajimaM (ed.). 2001. Polychaetous Annelids II. <i>Tokyo: Aquabiology.</i>                                                                                                                                                                                                                                            |    |    |    |        |    |    |    |                   |     |           |



**Table S2.** *Continued.*

---

**References for classification of functional groups**

---

- i.** Naruse, T., Watanabe, T., Yoshida, R. 2017. Additional information on distribution and habitats of six hexapodid species (Crustacea: Decapoda: Brachyura), with review of their Japanese names. *Fauna Ryukyuna*, 35: 17-28.
  - j.** Nishimura S (ed.). 1992. Guide to seashore animals of Japan with color pictures and keys (in Japanese), vol. 1. *Osaka: Hoikusha*.
  - k.** Nishimura S (ed.). 1995. Guide to seashore animals of Japan with color pictures and keys (in Japanese), vol. 2. *Osaka: Hoikusha*.
  - l.** Okutani T. 2000. Marine mollusks in Japan. *Tokyo: University of Tokyo Press*.
  - m.** Poore, G. C., Bruce, N. L. 2012. Global diversity of marine isopods (except Asellota and crustacean symbionts). *PLoS One*, 7: e43529.
  - n.** Scipione, M. B. 2013. Do studies of functional groups give more insight to amphipod biodiversity? *Crustaceana*, 86: 955-1006.
  - o.** Silva, F.L., Ruiz, S.S., Bochini, G.L., Moreira, D.C. 2008. Functional feeding habitats of Chironomidae larvae (Insecta, Diptera) in a lotic system from Midwestern region of São Paulo State, Brazil. *Pan-American Journal of Aquatic Sciences*, 3: 135-141.
  - p.** World Register of Marine Species (WoRMS). <http://www.marinespecies.org/>.
-
